# Supplementary material for: An Insight into Salvia haematodes L. (Lamiaceae) Bioactive Extracts Obtained by Traditional and Green Extraction Procedures
Source: MDPI journal article supplement (doi:10.3390/plants11060781), 2022-03-15
Supplement: s1 [file s1]

## Supplementary Materials

**Table S1.** AChE and BChE inhibitory activity (IC<sub>50</sub>, µg/mL and/or µM) of pure compounds from literature.

| Compound                    | Fraction   | AChE                 | BChE                 | Ref.   |
|-----------------------------|------------|----------------------|----------------------|--------|
| <i>trans</i> -Caryophyllene | N8, N9, S1 | 32% (at 0.06 mM)     | 78.6                 | 21, 22 |
| Phytol                      | N9, S1     | 12.5 µg/mL           | 23.9 µg/mL           | 23     |
| Caryophyllene oxide         | S1         | 41.46 (at 200 µg/mL) | 61.03 (at 200 µg/mL) | 24     |
| Eugenol                     | N8         | 42.4 µg/mL           | 63.5 µg/mL           | 25     |
| Methyl linoleate            | N9, S1     | 68.8 µM              | 247.8 µM             | 27     |
| Methyl palmitate            | N8         | > 500 µM             | > 500 µM             | 27     |
| β-Sitosterol                | N9         | 55.0 µg/mL           | 50.0 µg/mL           | 29     |
| Stigmasterol                | N9         | 63.0 µg/mL           | 67.0 µg/mL           | 33     |
